# Supplementary material
Source: ML conference proceedings conference paper supplement (https://proceedings.mlr.press/v119/tomar20a.html)
Supplement: Supplementary file [file tomar20a-supp.pdf]

# Appendix

## A. $\kappa$ -PI-DQN and $\kappa$ -VI-DQN Algorithms

### A.1. Detailed Pseudo-codes

In this section, we report the detailed pseudo-codes of  $\kappa$ -PI-DQN and  $\kappa$ -VI-DQN algorithms, described in Section 4.3, side-by-side.

---

#### Algorithm 5 $\kappa$ -PI-DQN

---

```

1: Initialize replay buffer  $\mathcal{D}$ ;  $Q$ -networks  $Q_\theta$  and  $Q_\phi$  with random weights  $\theta$  and  $\phi$ ;
2: Initialize target networks  $Q'_\theta$  and  $Q'_\phi$  with weights  $\theta' \leftarrow \theta$  and  $\phi' \leftarrow \phi$ ;
3: for  $i = 0, \dots, N_\kappa - 1$  do
4:   # Policy Improvement
5:   for  $t = 1, \dots, T_\kappa$  do
6:     Select  $a_t$  as an  $\epsilon$ -greedy action w.r.t.  $Q_\theta(s_t, a)$ ;
7:     Execute  $a_t$ , observe  $r_t$  and  $s_{t+1}$ , and store the tuple  $(s_t, a_t, r_t, s_{t+1})$  in  $\mathcal{D}$ ;
8:     Sample a random mini-batch  $\{(s_j, a_j, r_j, s_{j+1})\}_{j=1}^N$  from  $\mathcal{D}$ ;
9:     Update  $\theta$  by minimizing the following loss function:
10:     $\mathcal{L}_{Q_\theta} = \frac{1}{N} \sum_{j=1}^N [Q_\theta(s_j, a_j) - (r_j(\kappa, V_\phi) + \gamma \kappa \max_a Q'_\theta(s_{j+1}, a))]^2$ , where
11:     $V_\phi(s_{j+1}) = Q_\phi(s_{j+1}, \pi_{i-1}(s_{j+1}))$  and  $\pi_{i-1}(s_{j+1}) \in \arg \max_a Q'_\theta(s_{j+1}, a)$ ;
12:    Copy  $\theta$  to  $\theta'$  occasionally ( $\theta' \leftarrow \theta$ );
13:   end for
14:   # Policy Evaluation
15:   Set  $\pi_i(s) \in \arg \max_a Q'_\theta(s, a)$ ;
16:   for  $t' = 1, \dots, T(\kappa)$  do
17:     Sample a random mini-batch  $\{(s_j, a_j, r_j, s_{j+1})\}_{j=1}^N$  from  $\mathcal{D}$ ;
18:     Update  $\phi$  by minimizing the following loss function:
19:     $\mathcal{L}_{Q_\phi} = \frac{1}{N} \sum_{j=1}^N [Q_\phi(s_j, a_j) - (r_j + \gamma Q'_\phi(s_{j+1}, \pi_i(s_{j+1})))]^2$ ;
20:     Copy  $\phi$  to  $\phi'$  occasionally ( $\phi' \leftarrow \phi$ );
21:   end for
22: end for

```

---



---

#### Algorithm 6 $\kappa$ -VI-DQN

---

```

1: Initialize replay buffer  $\mathcal{D}$ ;  $Q$ -networks  $Q_\theta$  and  $Q_\phi$  with random weights  $\theta$  and  $\phi$ ;
2: Initialize target network  $Q'_\theta$  with weights  $\theta' \leftarrow \theta$ ;
3: for  $i = 0, \dots, N_\kappa - 1$  do
4:   # Evaluate  $T_\kappa V_\phi$  and the  $\kappa$ -greedy policy w.r.t.  $V_\phi$ 
5:   for  $t = 1, \dots, T_\kappa$  do
6:     Select  $a_t$  as an  $\epsilon$ -greedy action w.r.t.  $Q_\theta(s_t, a)$ ;
7:     Execute  $a_t$ , observe  $r_t$  and  $s_{t+1}$ , and store the tuple  $(s_t, a_t, r_t, s_{t+1})$  in  $\mathcal{D}$ ;
8:     Sample a random mini-batch  $\{(s_j, a_j, r_j, s_{j+1})\}_{j=1}^N$  from  $\mathcal{D}$ ;
9:     Update  $\theta$  by minimizing the following loss function:
10:     $\mathcal{L}_{Q_\theta} = \frac{1}{N} \sum_{j=1}^N [Q_\theta(s_j, a_j) - (r_j(\kappa, V_\phi) + \kappa \gamma \max_a Q'_\theta(s_{j+1}, a))]^2$ , where
11:     $V_\phi(s_{j+1}) = Q_\phi(s_{j+1}, \pi(s_{j+1}))$  and  $\pi(s_{j+1}) \in \arg \max_a Q_\phi(s_{j+1}, a)$ ;
12:    Copy  $\theta$  to  $\theta'$  occasionally ( $\theta' \leftarrow \theta$ );
13:   end for
14:   Copy  $\theta$  to  $\phi$  ( $\phi \leftarrow \theta$ )
15: end for

```

---

## Multi-step Greedy Reinforcement Learning Algorithms

| Hyperparameter                    | Value              |
|-----------------------------------|--------------------|
| Horizon (T)                       | 1000               |
| Adam stepsize                     | $1 \times 10^{-4}$ |
| Target network update frequency   | 1000               |
| Replay memory size                | 100000             |
| Discount factor                   | 0.99               |
| Total training time steps         | 10000000           |
| Minibatch size                    | 32                 |
| Initial exploration               | 1                  |
| Final exploration                 | 0.1                |
| Final exploration frame           | 1000000            |
| #Runs used for plot averages      | 10                 |
| Confidence interval for plot runs | $\sim 95\%$        |

Table 3: Hyperparameters for  $\kappa$ -PI-DQN and  $\kappa$ -VI-DQN.

### A.2. Ablation Test for $C_{FA}$

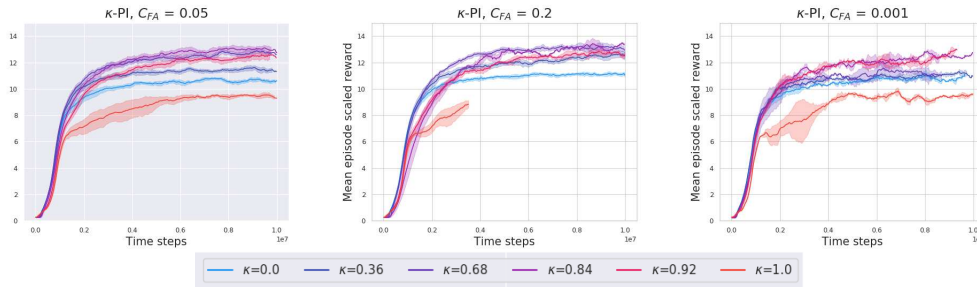

Figure 4: Performance of  $\kappa$ -PI-DQN and  $\kappa$ -VI-DQN on Breakout for different values of  $C_{FA}$ .

### A.3. $\kappa$ -PI-DQN and $\kappa$ -VI-DQN Plots

In this section, we report additional results of the application of  $\kappa$ -PI-DQN and  $\kappa$ -VI-DQN on the Atari domains. A summary of these results has been reported in Table 1 in the main paper.

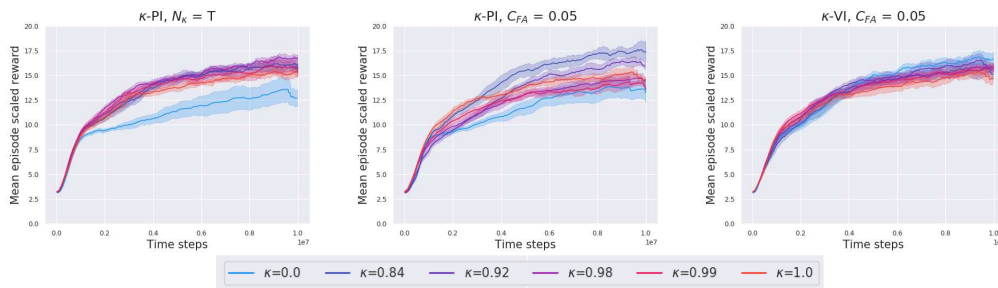

Figure 5: Training performance of the 'naive' baseline  $N_\kappa = T$  and  $\kappa$ -PI-DQN,  $\kappa$ -VI-DQN for  $C_{FA} = 0.05$  on SpaceInvaders

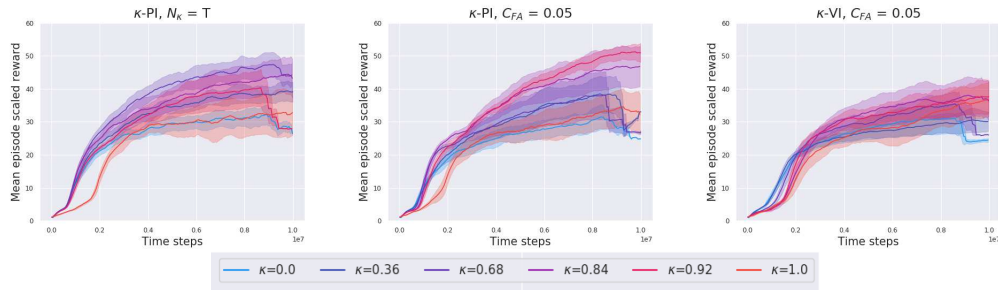

Figure 6: Training performance of the ‘naive’ baseline  $N_\kappa = T$  and  $\kappa$ -PI-DQN,  $\kappa$ -VI-DQN for  $C_{FA} = 0.05$  on Seaquest

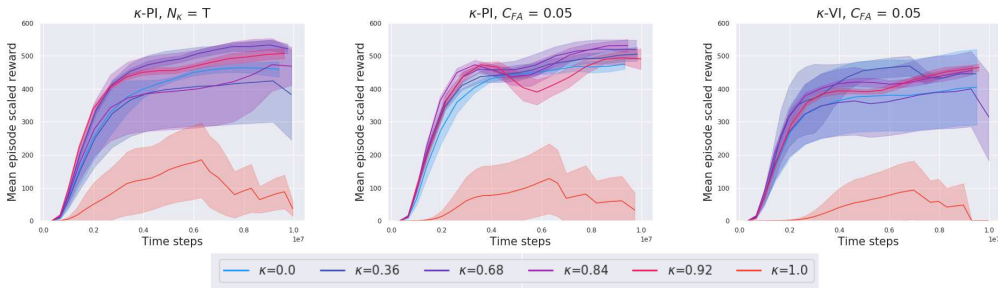

Figure 7: Training performance of the ‘naive’ baseline  $N_\kappa = T$  and  $\kappa$ -PI-DQN,  $\kappa$ -VI-DQN for  $C_{FA} = 0.05$  on Enduro

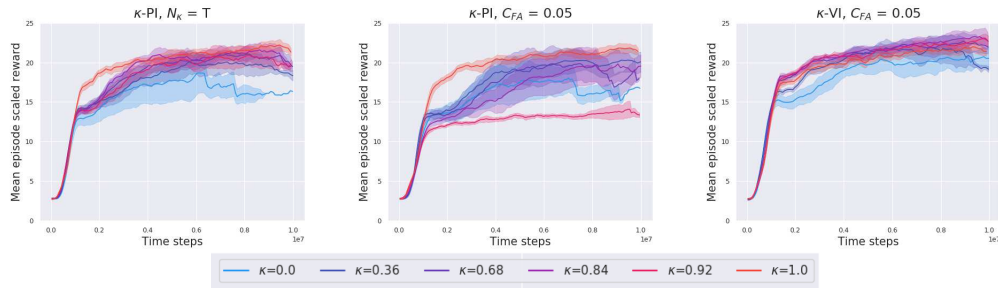

Figure 8: Training performance of the ‘naive’ baseline  $N_\kappa = T$  and  $\kappa$ -PI-DQN,  $\kappa$ -VI-DQN for  $C_{FA} = 0.05$  on BeamRider

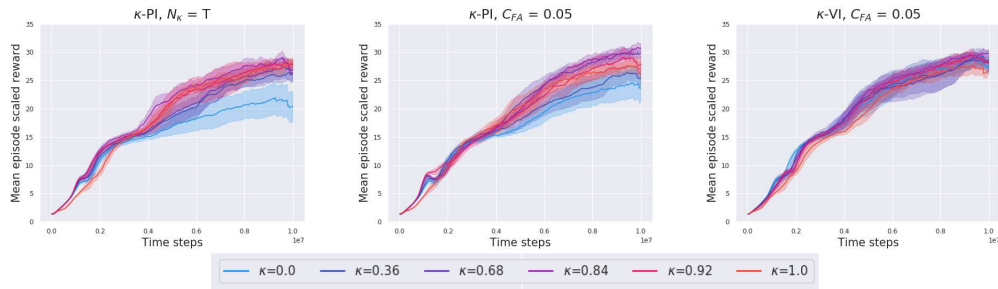

Figure 9: Training performance of the ‘naive’ baseline  $N_\kappa = T$  and  $\kappa$ -PI-DQN,  $\kappa$ -VI-DQN for  $C_{FA} = 0.05$  on Qbert

## B. $\kappa$ -PI-TRPO and $\kappa$ -VI-TRPO Algorithms

### B.1. Detailed Pseudo-codes

In this section, we report the detailed pseudo-codes of the  $\kappa$ -PI-TRPO and  $\kappa$ -VI-TRPO algorithms, described in Section 4.4, side-by-side.

---

#### Algorithm 7 $\kappa$ -PI-TRPO

---

```

1: Initialize  $V$ -networks  $V_\theta$  and  $V_\phi$  with random weights  $\theta$  and  $\phi$ ; policy network  $\pi_\psi$  with random weights  $\psi$ ;
2: for  $i = 0, \dots, N_\kappa - 1$  do
3:   for  $t = 1, \dots, T_\kappa$  do
4:     Simulate the current policy  $\pi_\psi$  for  $M$  time-steps;
5:     for  $j = 1, \dots, M$  do
6:       Calculate  $R_j(\kappa, V_\phi) = \sum_{t=j}^M (\gamma\kappa)^{t-j} r_t(\kappa, V_\phi)$  and  $\rho_j = \sum_{t=j}^M \gamma^{t-j} r_t$ ;
7:     end for
8:     Sample a random mini-batch  $\{(s_j, a_j, r_j, s_{j+1})\}_{j=1}^N$  from the simulated  $M$  time-steps;
9:     Update  $\theta$  by minimizing the loss function:  $\mathcal{L}_{V_\theta} = \frac{1}{N} \sum_{j=1}^N (V_\theta(s_j) - R_j(\kappa, V_\phi))^2$ ;
10:    # Policy Improvement
11:    Sample a random mini-batch  $\{(s_j, a_j, r_j, s_{j+1})\}_{j=1}^N$  from the simulated  $M$  time-steps;
12:    Update  $\psi$  using TRPO with advantage function computed by  $\{(R_j(\kappa, V_\phi), V_\theta(s_j))\}_{j=1}^N$ ;
13:  end for
14:  # Policy Evaluation
15:  Sample a random mini-batch  $\{(s_j, a_j, r_j, s_{j+1})\}_{j=1}^N$  from the simulated  $M$  time-steps;
16:  Update  $\phi$  by minimizing the loss function:  $\mathcal{L}_{V_\phi} = \frac{1}{N} \sum_{j=1}^N (V_\phi(s_j) - \rho_j)^2$ ;
17: end for

```

---



---

#### Algorithm 8 $\kappa$ -VI-TRPO

---

```

1: Initialize  $V$ -networks  $V_\theta$  and  $V_\phi$  with random weights  $\theta$  and  $\phi$ ; policy network  $\pi_\psi$  with random weights  $\psi$ ;
2: for  $i = 0, \dots, N_\kappa - 1$  do
3:   # Evaluate  $T_\kappa V_\phi$  and the  $\kappa$ -greedy policy w.r.t.  $V_\phi$ 
4:   for  $t = 1, \dots, T_\kappa$  do
5:     Simulate the current policy  $\pi_\psi$  for  $M$  time-steps;
6:     for  $j = 1, \dots, M$  do
7:       Calculate  $R_j(\kappa, V_\phi) = \sum_{t=j}^M (\gamma\kappa)^{t-j} r_t(\kappa, V_\phi)$ ;
8:     end for
9:     Sample a random mini-batch  $\{(s_j, a_j, r_j, s_{j+1})\}_{j=1}^N$  from the simulated  $M$  time-steps;
10:    Update  $\theta$  by minimizing the loss function:  $\mathcal{L}_{V_\theta} = \frac{1}{N} \sum_{j=1}^N (V_\theta(s_j) - R_j(\kappa, V_\phi))^2$ ;
11:    Sample a random mini-batch  $\{(s_j, a_j, r_j, s_{j+1})\}_{j=1}^N$  from the simulated  $M$  time-steps;
12:    Update  $\psi$  using TRPO with advantage function computed by  $\{(R_j(\kappa, V_\phi), V_\theta(s_j))\}_{j=1}^N$ ;
13:  end for
14:  Copy  $\theta$  to  $\phi$  ( $\phi \leftarrow \theta$ );
15: end for

```

---

## Multi-step Greedy Reinforcement Learning Algorithms

| Hyperparameter                    | Value              |
|-----------------------------------|--------------------|
| Horizon (T)                       | 1000               |
| Adam stepsize                     | $1 \times 10^{-3}$ |
| Number of samples per Iteration   | 1024               |
| Entropy coefficient               | 0.01               |
| Discount factor                   | 0.99               |
| Number of Iterations              | 2000               |
| Minibatch size                    | 128                |
| #Runs used for plot averages      | 10                 |
| Confidence interval for plot runs | $\sim 95\%$        |

Table 4: Hyper-parameters of  $\kappa$ -PI-TRPO and  $\kappa$ -VI-TRPO on the MuJoCo domains.

### B.2. Ablation Test for $C_{FA}$

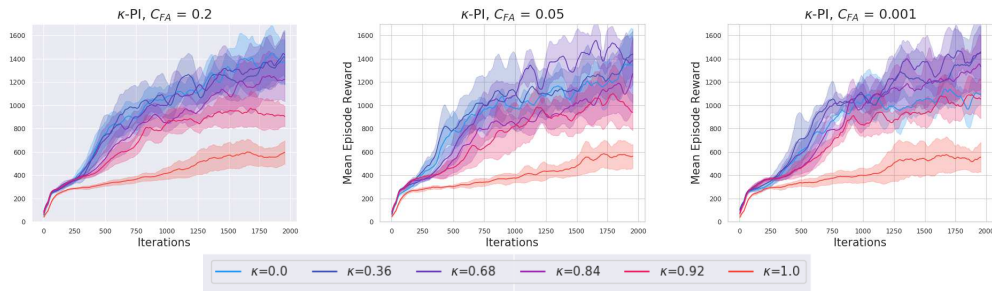

Figure 10: Performance of  $\kappa$ -PI-TRPO and  $\kappa$ -VI-TRPO on Walker2d-v2 for different values of  $C_{FA}$ .

### B.3. $\kappa$ -PI-TRPO and $\kappa$ -VI-TRPO Plots

In this section, we report additional results of the application of  $\kappa$ -PI-TRPO and  $\kappa$ -VI-TRPO on the MuJoCo domains. A summary of these results has been reported in Table 2 in the main paper.

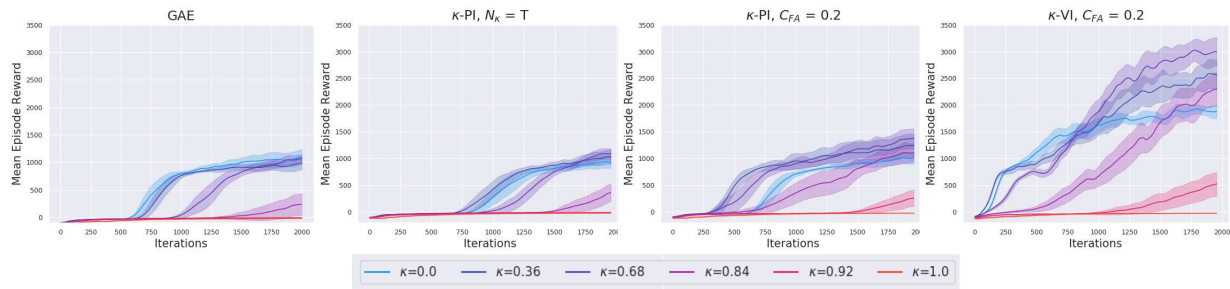

Figure 11: Performance of GAE, ‘Naive’ baseline and  $\kappa$ -PI-TRPO,  $\kappa$ -VI-TRPO on Ant-v2.

## Multi-step Greedy Reinforcement Learning Algorithms

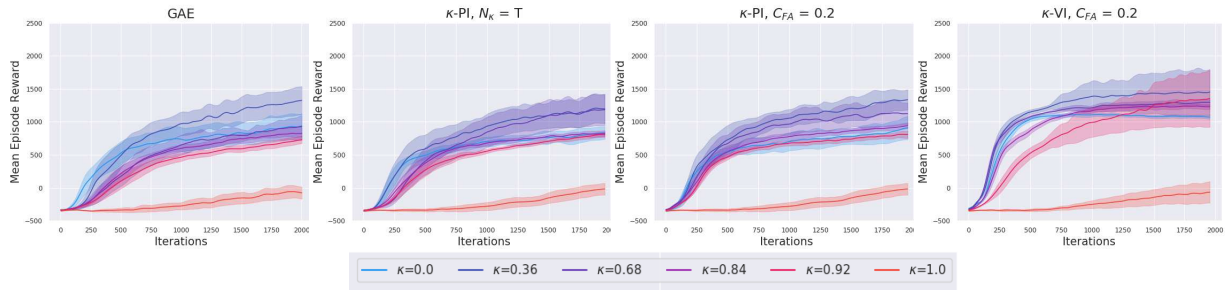

Figure 12: Performance of GAE, ‘Naive’ baseline and  $\kappa$ -PI-TRPO,  $\kappa$ -VI-TRPO on HalfCheetah-v2.

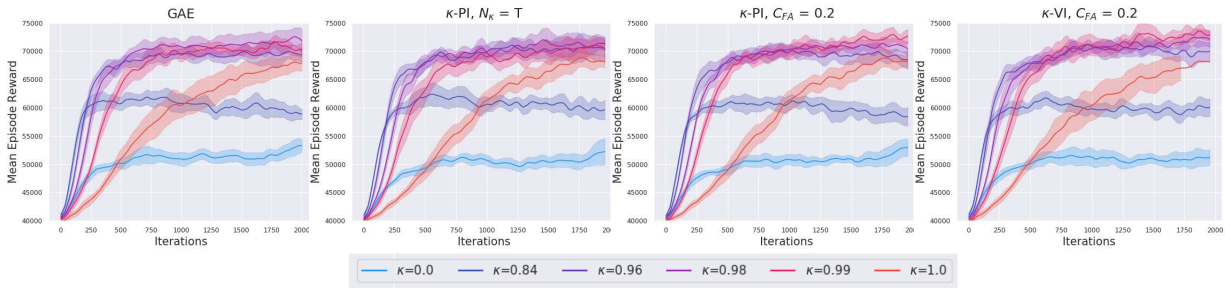

Figure 13: Performance of GAE, ‘Naive’ baseline and  $\kappa$ -PI-TRPO,  $\kappa$ -VI-TRPO on HumanoidStandup-v2.

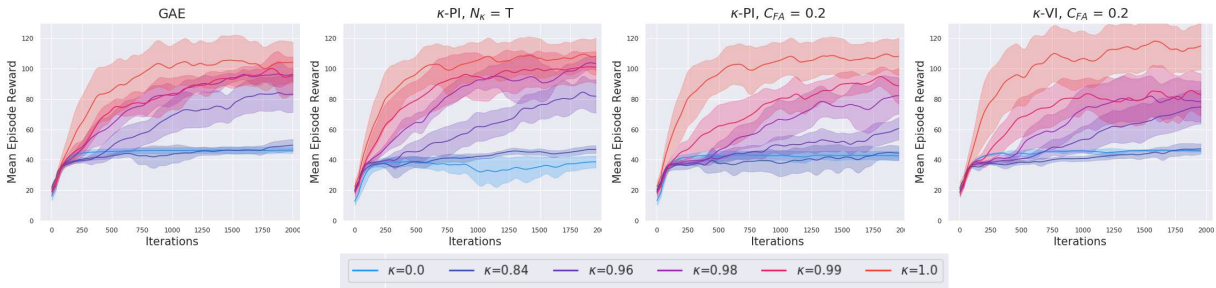

Figure 14: Performance of GAE, ‘Naive’ baseline and  $\kappa$ -PI-TRPO,  $\kappa$ -VI-TRPO on Swimmer-v2.

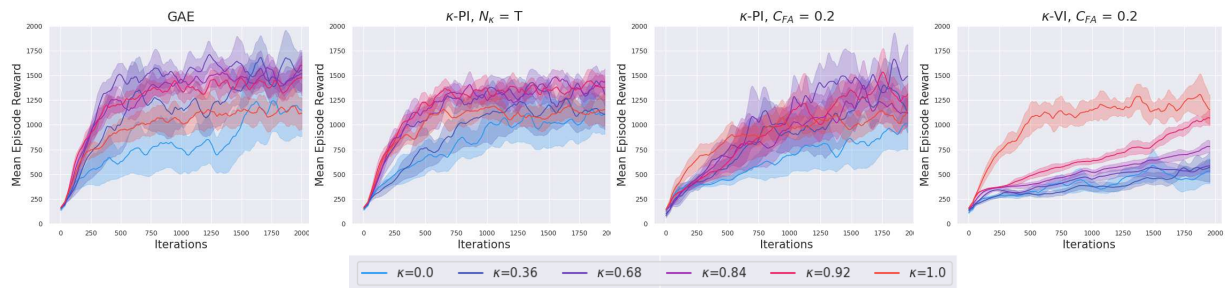

Figure 15: Performance of GAE, ‘Naive’ baseline and  $\kappa$ -PI-TRPO,  $\kappa$ -VI-TRPO on Hopper-v2.
